# Supplementary material for: Genome-wide association mapping of partial resistance to Phytophthora sojae in soybean plant introductions from the Republic of Korea
Source: PubMed Central journal article supplement (PMC4982113; doi:10.1186/s12864-016-2918-5), 2016-08-11
Supplement: 12864_2016_2918_MOESM1_ESM.pdf [file 12864_2016_2918_MOESM1_ESM.pdf]

# **Genome-wide association mapping of partial resistance to *Phytophthora sojae* in soybean plant introductions from the Republic of Korea**

Rhiannon Schneider<sup>1,2</sup>, William Rolling<sup>3</sup>, Qijian Song<sup>4</sup>, Perry Cregan<sup>4</sup>, Anne E. Dorrance<sup>3,5</sup>, Leah K. McHale<sup>1,3</sup>

\*Corresponding author: Leah K. McHale, mchale.21@osu.edu

<sup>1</sup> Department of Horticulture and Crop Science, The Ohio State University, Columbus, OH, 43210

<sup>2</sup> Current Address: Pioneer Hi-Bred International Inc., Napoleon, OH, 43545

<sup>3</sup> Center for Applied Plant Sciences, The Ohio State University, Columbus, OH 43210

<sup>4</sup> Soybean Genomics and Improvement Laboratory, US Department of Agriculture, Agricultural Research Service, Beltsville, MD 20705

<sup>5</sup> Department of Plant Pathology, The Ohio State University, Wooster, OH 44691

**Supplemental Tables (S1-S2) and Supplemental Figures (S1-S3).**

**Supplemental Table S1.** Summary of mean lesion lengths from tray tests and virulence profiles from hypocotyl inoculations utilizing 22 different isolates of *P. sojae*.

| Isolate                 | Average Lesion Length (mm) |              | Virulence profile                                       |
|-------------------------|----------------------------|--------------|---------------------------------------------------------|
|                         | Conrad                     | Sloan        |                                                         |
| 1S11                    | 14.19                      | 16.56        | 1a, 1b, 1d, 1k, 2, 3a, 3b, 3c, 4, 5, 6, 7, 8            |
| 9d                      | ND <sup>b</sup>            | ND           | 1a, 1b, 1c, 1d, 1k, 3a, 3b, 4, 5, 6, 7, 8               |
| Ash 1-1                 | 12.44                      | 12.08        | 1a, 1b, 1c, 1d, 1k, 3a, 3b, 7, 8                        |
| Butler MU S.1.          | 9.13                       | 15.25        | 1a, 1b, 1c, 1d, 1k, 3a, 7                               |
| <b>C2S1<sup>a</sup></b> | <b>12.50</b>               | <b>ND</b>    | <b>1a, 1b, 1c, 1d, 1k, 2, 3a, 3b, 3c, 4, 5, 6, 7, 8</b> |
| DFL-1                   | 5.94                       | 20.19        | 1a, 1b, 1d, 1k, 7                                       |
| DP5                     | 16.44                      | 18.63        | 1a, 1b, 1d, 1k, 3a, 7, 8                                |
| MMI12004_04_0.2         | 18.19                      | 29.94        | 1a, 1b, 1c, 1d, 1k, 2, 3a, 3b, 3c, 4, 5, 6, 7           |
| OH1200110.1             | 15.88                      | 20.69        | 1a, 1b, 1c, 3a, 3b, 5, 6, 7, 8                          |
| OH120049.1              | 23.38                      | 16.88        | 1a, 1c, 1d, 1k, 2, 3a, 3b, 3c, 5, 7, 8                  |
| OH120484.1              | 15.78                      | ND           | 1a, 1b, 1c, 1d, 1k, 2, 3a, 3b, 5, 7, 8                  |
| OH121033.4              | 15.38                      | 21.94        | 1a, 1b, 1c, 1d, 1k, 2, 3a, 3c, 4, 7, 8                  |
| OH121047.1              | ND                         | ND           | 1a, 1b, 1c, 1d, 1k, 2, 3a, 3b, 3c, 5, 6, 7, 8           |
| OH121074.4              | 10.00                      | ND           | 1a, 1b, 1c, 1d, 1k, 3a, 3b, 3c, 4, 5, 7, 8              |
| <b>OH121086.3</b>       | <b>14.00</b>               | <b>23.00</b> | <b>1a, 1b, 1c, 1d, 1k, 2, 3a, 3c, 4, 5, 6, 7, 8</b>     |
| OH121087.1              | 19.88                      | 22.06        | 1a, 1b, 1c, 1d, 1k, 2, 3a, 3b, 3c, 5, 6, 7              |
| OH121108.2              | 16.69                      | 22.43        | 1a, 1b, 1c, 1d, 1k, 2, 3a, 3b, 3c, 4, 5, 6, 7, 8        |
| OH121187.2              | 12.00                      | 20.63        | 1a, 1b, 1c, 1d, 1k, 2, 3a, 3b, 3c, 4, 5, 6, 7           |
| OH121189.1              | 20.92                      | ND           | 1a, 1b, 1c, 1d, 1k, 2, 3a, 3b, 3c, 4, 5, 6, 7, 8        |
| OH121215.1              | 25.56                      | 21.81        | 1a, 1b, 1c, 1d, 1k, 2, 3a, 3b, 3c, 5, 6, 7, 8           |
| OH121018.1              | 17.31                      | 16.13        | 1a, 1b, 1c, 1d, 1k, 2, 3a, 3c, 5, 7, 8                  |
| OH121215.1              | 29.88                      | 28.26        | 1a, 1b, 1c, 1d, 2, 3a, 3b, 3c, 4, 5, 6, 7, 8            |

<sup>a</sup> Isolates selected for disease assays in this study are indicated in bold.

<sup>b</sup> ND: Not determined

**Supplemental Table S2a.** Hypocotyl assay with isolate C2S1 and genotypic data of markers within QTL for 94 randomly selected accessions included in the GWA analysis.

| Accession | No. seedlings dead/Total no. seedlings <sup>a</sup> | Resistant (R) or susceptible (S) allele for significant markers at each QTL |                       |                       |                       |                       |                        |                        |                        |                        |                        |                        |                        |                        |                        |                        |                        |
|-----------|-----------------------------------------------------|-----------------------------------------------------------------------------|-----------------------|-----------------------|-----------------------|-----------------------|------------------------|------------------------|------------------------|------------------------|------------------------|------------------------|------------------------|------------------------|------------------------|------------------------|------------------------|
|           |                                                     | ss715585712 (QTL 3-1)                                                       | ss715585728 (QTL 3-1) | ss715586320 (QTL 3-2) | ss715586321 (QTL 3-2) | ss715586376 (QTL 3-3) | ss715615031 (QTL 13-1) | ss715635897 (QTL 19-1) | ss715635934 (QTL 19-2) | ss715636056 (QTL 19-3) | ss715636059 (QTL 19-3) | ss715636064 (QTL 19-3) | ss715636073 (QTL 19-3) | ss715636076 (QTL 19-3) | ss715636077 (QTL 19-3) | ss715636083 (QTL 19-3) | ss715636084 (QTL 19-3) |
| PI 398588 | 6/6                                                 | R                                                                           | S                     | R                     | S                     | S                     | S                      | S                      | S                      | S                      | S                      | S                      | R                      | R                      | R                      | R                      | R                      |
| PI 398600 | 8/8                                                 | S                                                                           | R                     | S                     | R                     | R                     | R                      | S                      | S                      | S                      | S                      | S                      | R                      | R                      | R                      | R                      | R                      |
| PI 398601 | 8/8                                                 | S                                                                           | R                     | S                     | R                     | R                     | R                      | S                      | S                      | S                      | S                      | S                      | R                      | R                      | R                      | R                      | R                      |
| PI 398604 | 5/5                                                 | S                                                                           | R                     | S                     | R                     | R                     | R                      | S                      | S                      | S                      | S                      | S                      | R                      | R                      | R                      | R                      | R                      |
| PI 398620 | 5/5                                                 | S                                                                           | R                     | S                     | R                     | R                     | R                      | S                      | S                      | S                      | S                      | S                      | R                      | R                      | R                      | R                      | R                      |
| PI 398624 | 4/4                                                 | S                                                                           | R                     | S                     | R                     | R                     | R                      | S                      | S                      | S                      | S                      | S                      | R                      | R                      | R                      | R                      | R                      |
| PI 398627 | 4/4                                                 | S                                                                           | R                     | S                     | R                     | R                     | R                      | S                      | S                      | S                      | S                      | S                      | R                      | R                      | R                      | R                      | R                      |
| PI 398637 | 8/8                                                 | S                                                                           | R                     | S                     | R                     | R                     | R                      | S                      | S                      | S                      | S                      | S                      | R                      | R                      | R                      | R                      | R                      |
| PI 398638 | 8/8                                                 | S                                                                           | R                     | S                     | R                     | R                     | R                      | S                      | S                      | S                      | S                      | S                      | R                      | R                      | R                      | R                      | R                      |
| PI 398639 | 7/7                                                 | S                                                                           | R                     | S                     | R                     | S                     | R                      | S                      | S                      | S                      | S                      | S                      | R                      | R                      | R                      | R                      | R                      |
| PI 398641 | 4/4                                                 | S                                                                           | R                     | S                     | R                     | R                     | R                      | S                      | S                      | S                      | S                      | S                      | R                      | R                      | R                      | R                      | R                      |
| PI 398642 | 5/5                                                 | S                                                                           | R                     | S                     | R                     | R                     | R                      | S                      | S                      | S                      | S                      | S                      | R                      | R                      | R                      | R                      | R                      |
| PI 398644 | 6/6                                                 | S                                                                           | R                     | S                     | R                     | R                     | R                      | S                      | S                      | S                      | S                      | S                      | R                      | R                      | R                      | R                      | R                      |
| PI 398654 | 4/4                                                 | S                                                                           | R                     | S                     | R                     | R                     | R                      | S                      | S                      | S                      | S                      | S                      | R                      | R                      | R                      | R                      | R                      |
| PI 398655 | 6/6                                                 | S                                                                           | R                     | S                     | R                     | R                     | R                      | S                      | S                      | S                      | S                      | S                      | R                      | R                      | R                      | R                      | R                      |
| PI 398657 | 5/5                                                 | S                                                                           | R                     | S                     | R                     | R                     | R                      | S                      | S                      | S                      | S                      | S                      | R                      | R                      | R                      | R                      | R                      |
| PI 398686 | 6/6                                                 | R                                                                           | S                     | S                     | R                     | R                     | R                      | S                      | S                      | S                      | S                      | S                      | R                      | R                      | R                      | R                      | R                      |
| PI 398696 | 6/6                                                 | S                                                                           | R                     | S                     | R                     | R                     | R                      | S                      | S                      | S                      | S                      | S                      | R                      | R                      | R                      | R                      | R                      |
| PI 398698 | 4/4                                                 | R                                                                           | S                     | R                     | S                     | S                     | R                      | S                      | S                      | S                      | S                      | S                      | R                      | R                      | R                      | R                      | R                      |
| PI 398706 | 7/7                                                 | S                                                                           | R                     | S                     | R                     | R                     | R                      | S                      | S                      | S                      | S                      | S                      | R                      | R                      | R                      | R                      | R                      |
| PI 398708 | 7/7                                                 | R                                                                           | S                     | R                     | S                     | S                     | S                      | S                      | S                      | S                      | S                      | S                      | R                      | R                      | R                      | R                      | R                      |
| PI 398710 | 9/9                                                 | S                                                                           | R                     | S                     | R                     | R                     | R                      | S                      | S                      | S                      | S                      | S                      | R                      | R                      | R                      | R                      | R                      |
| PI 398712 | 6/6                                                 | S                                                                           | R                     | S                     | R                     | R                     | R                      | S                      | S                      | S                      | S                      | S                      | R                      | R                      | R                      | R                      | R                      |
| PI 398727 | 5/5                                                 | S                                                                           | R                     | S                     | R                     | R                     | R                      | S                      | S                      | S                      | S                      | S                      | R                      | R                      | R                      | R                      | R                      |
| PI 398735 | 5/5                                                 | S                                                                           | R                     | S                     | R                     | R                     | R                      | S                      | S                      | S                      | S                      | S                      | R                      | R                      | R                      | R                      | R                      |
| PI 398744 | 4/4                                                 | S                                                                           | R                     | S                     | R                     | R                     | R                      | S                      | S                      | S                      | S                      | S                      | R                      | R                      | R                      | R                      | R                      |
| PI 398750 | 10/10                                               | R                                                                           | S                     | R                     | S                     | S                     | S                      | S                      | S                      | S                      | S                      | S                      | R                      | R                      | R                      | R                      | R                      |
| PI 398751 | 6/6                                                 | S                                                                           | R                     | S                     | R                     | R                     | R                      | S                      | S                      | S                      | S                      | S                      | R                      | R                      | R                      | R                      | R                      |
| PI 398752 | 8/8                                                 | S                                                                           | R                     | S                     | R                     | R                     | R                      | S                      | S                      | S                      | S                      | S                      | R                      | R                      | R                      | R                      | R                      |
| PI 398753 | 4/4                                                 | S                                                                           | R                     | S                     | R                     | R                     | R                      | S                      | S                      | S                      | S                      | S                      | R                      | R                      | R                      | R                      | R                      |
| PI 398754 | 6/6                                                 | S                                                                           | R                     | S                     | R                     | R                     | R                      | S                      | S                      | S                      | S                      | S                      | R                      | R                      | R                      | R                      | R                      |
| PI 398776 | 8/8                                                 | S                                                                           | R                     | S                     | R                     | R                     | R                      | S                      | S                      | S                      | S                      | S                      | R                      | R                      | R                      | R                      | R                      |
| PI 398788 | 7/7                                                 | S                                                                           | R                     | S                     | R                     | R                     | R                      | S                      | S                      | S                      | S                      | S                      | R                      | R                      | R                      | R                      | R                      |
| PI 398802 | 5/5                                                 | R                                                                           | S                     | R                     | S                     | S                     | S                      | S                      | S                      | S                      | S                      | S                      | R                      | R                      | R                      | R                      | R                      |
| PI 398803 | 6/6                                                 | R                                                                           | R                     | R                     | R                     | R                     | R                      | S                      | S                      | S                      | S                      | S                      | R                      | R                      | R                      | R                      | R                      |
| PI 398806 | 8/8                                                 | S                                                                           | R                     | S                     | R                     | S                     | R                      | S                      | S                      | S                      | S                      | S                      | R                      | R                      | R                      | R                      | R                      |
| PI 398807 | 4/4                                                 | S                                                                           | R                     | S                     | R                     | R                     | R                      | R                      | S                      | S                      | S                      | S                      | R                      | R                      | R                      | R                      | R                      |
| PI 398808 | 5/5                                                 | S                                                                           | R                     | S                     | R                     | R                     | R                      | S                      | S                      | S                      | S                      | S                      | R                      | R                      | R                      | R                      | R                      |
| PI 398813 | 7/7                                                 | S                                                                           | R                     | S                     | R                     | R                     | R                      | S                      | S                      | S                      | S                      | S                      | R                      | R                      | R                      | R                      | R                      |
| PI 398814 | 5/5                                                 | S                                                                           | R                     | S                     | R                     | R                     | R                      | S                      | S                      | S                      | S                      | S                      | R                      | R                      | R                      | R                      | R                      |
| PI 398816 | 4/4                                                 | S                                                                           | R                     | S                     | R                     | R                     | R                      | S                      | S                      | S                      | S                      | S                      | R                      | R                      | R                      | R                      | R                      |
| PI 398820 | 4/4                                                 | S                                                                           | R                     | S                     | R                     | R                     | R                      | S                      | S                      | S                      | S                      | S                      | R                      | R                      | R                      | R                      | R                      |
| PI 398821 | 9/9                                                 | S                                                                           | R                     | S                     | R                     | R                     | R                      | R                      | S                      | S                      | S                      | S                      | R                      | R                      | R                      | R                      | R                      |
| PI 398822 | 8/8                                                 | S                                                                           | R                     | S                     | R                     | R                     | R                      | R                      | S                      | S                      | S                      | S                      | R                      | R                      | R                      | R                      | R                      |
| PI 398831 | 8/8                                                 | S                                                                           | R                     | S                     | R                     | R                     | R                      | R                      | S                      | S                      | S                      | S                      | R                      | R                      | R                      | R                      | R                      |
| PI 398832 | 5/5                                                 | S                                                                           | R                     | S                     | R                     | R                     | R                      | S                      | S                      | S                      | S                      | S                      | R                      | R                      | R                      | R                      | R                      |

|           |          |   |   |   |   |   |   |   |   |   |   |   |   |   |   |   |   |
|-----------|----------|---|---|---|---|---|---|---|---|---|---|---|---|---|---|---|---|
| PI 398843 | 9/9      | R | S | S | R | S | S | S | S | S | S | S | R | R | R | R | R |
| PI 398858 | 5/5      | R | S | R | S | S | R | S | S | S | S | S | R | R | R | R | R |
| PI 398868 | 5/5      | S | R | S | R | S | R | S | S | S | S | S | R | R | R | R | R |
| PI 398871 | 4/4      | R | S | R | S | R | S | S | S | S | S | S | R | R | R | R | R |
| PI 398878 | 8/8      | S | R | S | R | R | R | S | S | S | S | S | R | R | R | R | R |
| PI 398881 | 9/9      | S | R | S | R | R | R | S | S | S | S | S | R | R | R | R | R |
| PI 398883 | 5/5      | S | R | S | R | R | S | S | S | S | S | S | R | R | R | R | R |
| PI 398885 | 6/6      | S | R | S | R | R | S | S | S | S | S | S | R | R | R | R | R |
| PI 398886 | 5/5      | R | S | R | S | S | S | S | S | S | S | S | R | R | R | R | R |
| PI 398887 | 7/7      | R | S | R | S | S | S | S | S | S | S | S | R | R | R | R | R |
| PI 398888 | 6/6      | S | R | S | R | R | S | S | S | S | S | S | R | R | R | R | R |
| PI 398889 | 6/6, 7/7 | S | R | S | R | R | S | S | S | S | S | S | R | R | R | R | R |
| PI 398891 | 6/6      | S | R | S | R | R | S | S | S | S | S | S | R | R | R | R | R |
| PI 398898 | 8/8      | S | R | S | R | R | R | S | S | S | S | S | R | R | R | R | R |
| PI 398899 | 8/8      | S | R | S | R | R | R | S | S | S | S | S | R | R | R | R | R |
| PI 398901 | 4/4      | S | R | S | R | R | S | S | S | S | S | S | R | R | R | R | R |
| PI 398908 | 7/7      | S | R | S | R | R | S | S | S | S | S | S | R | R | R | R | R |
| PI 398921 | 8/8      | S | R | S | R | R | R | S | S | S | S | S | R | R | R | R | R |
| PI 398923 | 7/7      | R | S | S | R | S | R | S | S | S | S | S | R | R | R | R | R |
| PI 398924 | 10/10    | S | R | S | R | R | S | S | S | S | S | S | R | R | R | R | R |
| PI 398927 | 4/4      | S | R | S | R | R | R | S | S | S | S | S | R | R | R | R | R |
| PI 398929 | 5/5      | S | R | S | R | R | R | S | S | S | S | S | R | R | R | R | R |
| PI 398930 | 8/8      | S | R | S | R | R | S | S | S | S | S | S | R | R | R | R | R |
| PI 398931 | 6/6      | S | R | S | R | R | S | S | S | S | S | S | R | R | R | R | R |
| PI 398934 | 10/10    | S | R | S | R | R | R | S | S | S | S | S | R | R | R | R | R |
| PI 398936 | 5/5      | R | S | S | R | S | R | S | S | S | S | S | R | R | R | R | R |
| PI 398941 | 7/7      | S | R | S | R | R | S | S | S | S | S | S | R | R | R | R | R |
| PI 398942 | 5/5      | S | R | S | R | R | R | S | S | S | S | S | R | R | R | R | R |
| PI 398953 | 10/10    | S | R | S | R | R | R | S | S | S | S | S | R | R | R | R | R |
| PI 398957 | 5/5      | S | R | S | R | S | S | S | S | S | S | S | R | R | R | R | R |
| PI 398960 | 6/6      | S | R | S | R | R | R | S | S | S | S | S | R | R | R | R | R |
| PI 398980 | 6/6      | S | R | S | R | R | R | S | S | S | S | S | R | R | R | R | R |
| PI 398982 | 6/6      | S | R | R | S | S | S | S | S | S | S | S | R | R | R | R | R |
| PI 398987 | 4/4      | S | R | S | R | R | S | S | S | S | S | S | R | R | R | R | R |
| PI 398990 | 5/5      | R | S | R | S | S | R | S | S | S | S | S | R | R | R | R | R |
| PI 398995 | 8/8      | S | R | S | R | R | R | S | S | S | S | S | R | R | R | R | R |
| PI 399010 | 6/6      | S | R | S | R | R | R | S | S | S | S | S | R | R | R | R | R |
| PI 399011 | 7/7      | S | R | S | R | R | S | S | S | S | S | S | R | R | R | R | R |
| PI 399018 | 6/6      | S | R | S | R | R | R | S | S | S | S | S | R | R | R | R | R |
| PI 399028 | 5/5      | S | R | S | R | R | R | S | S | S | S | S | R | R | R | R | R |
| PI 399031 | 4/4      | S | R | S | R | R | R | S | S | S | S | S | R | R | R | R | R |
| PI 399034 | 6/6      | S | R | S | R | R | S | S | S | S | S | S | R | R | R | R | R |
| PI 399035 | 8/8      | S | R | S | R | R | R | S | S | S | S | S | R | R | R | R | R |
| PI 399039 | 7/7      | S | R | S | R | R | S | S | S | S | S | S | R | R | R | R | R |
| PI 399043 | 5/5      | S | R | S | R | R | R | S | S | S | S | S | R | R | R | R | R |
| PI 399046 | 7/7      | S | R | S | R | R | S | S | S | S | S | S | R | R | R | R | R |
| PI 399051 | 7/7      | S | R | S | R | R | S | S | S | S | S | S | R | R | R | R | R |
| PI 399063 | 4/4      | S | R | S | R | R | S | S | S | S | S | S | R | R | R | R | R |

<sup>a</sup> Greater than 75% survival is considered an incompatible reaction, indicating avirulence of the isolate.

**Supplemental Table S2b.** Hypocotyl assay of differentials for isolate C2S1.

| Differential line <sup>b</sup> | No. seedlings dead/ Total no. seedlings <sup>a</sup> |       |       |       |
|--------------------------------|------------------------------------------------------|-------|-------|-------|
|                                | Rep 1                                                | Rep 2 | Rep 3 | Rep 4 |
| Williams                       | 12/12                                                | 8/8   | 7/7   | 9/9   |
| Harlon                         | 10/10                                                | 10/10 | 8/8   | 8/8   |
| Harosoy 13XX                   | 10/10                                                | 11/11 | 9/9   | 7/7   |
| Williams 79                    | 9/9                                                  | 7/7   | 8/8   | 7/7   |
| PI 103091                      | 10/10                                                | 7/7   | 6/7   | 9/9   |
| Williams 82                    | 8/8                                                  | 10/10 | 8/8   | 6/6   |
| L76-1988                       | 9/9                                                  | 12/12 | 10/10 | 8/8   |
| L83-570                        | 10/10                                                | 9/9   | 11/11 | 11/11 |
| PRX 146-36                     | 7/7                                                  | 8/8   | 2/10  | 9/9   |
| PRX 145-48                     | 11/11                                                | 8/8   | 12/12 | 9/9   |
| L85-2352                       | 7/7                                                  | 7/7   | 10/11 | 5/5   |
| L85-3059                       | 11/11                                                | 10/10 | 10/10 | 8/8   |
| Harosoy 62XX                   | 7/7                                                  | 11/11 | 10/10 | 9/9   |
| Harosoy                        | 12/12                                                | 9/9   | 11/11 | 8/8   |
| PI 399073                      | 5/5                                                  | 6/6   | 4/5   | 5/5   |

<sup>a</sup> Greater than 75% survival is considered an incompatible reaction, indicating avirulence of the isolate.

<sup>b</sup> The Rps genotype of the soybean differentials used to verify the pathotype of C2S1 were as follows: Williams (*rps/rps*), Harlon (*Rps1a/Rps1a*), Harosoy 13XX (*Rps1b/Rps1b*), Williams 79 (*Rps1c/Rps1c*), PI 103091 (*Rps1d/Rps1d*), Williams 82 (*Rps1k/Rps1k*), L76-1988 (*Rps2/Rps2*), L83-570 (*Rps3a/Rps3a*), PRX 146-36 (*Rps3b/Rps3b*), PRX 145-48 (*Rps3c/Rps3c*), L85-2352 (*Rps4/Rps4*), L85-3059 (*Rps5/Rps5*), Harosoy 62XX (*Rps6/Rps6*), Harosoy (*Rps7/Rps7*), and PI 399073 (*Rps8/Rps8*).

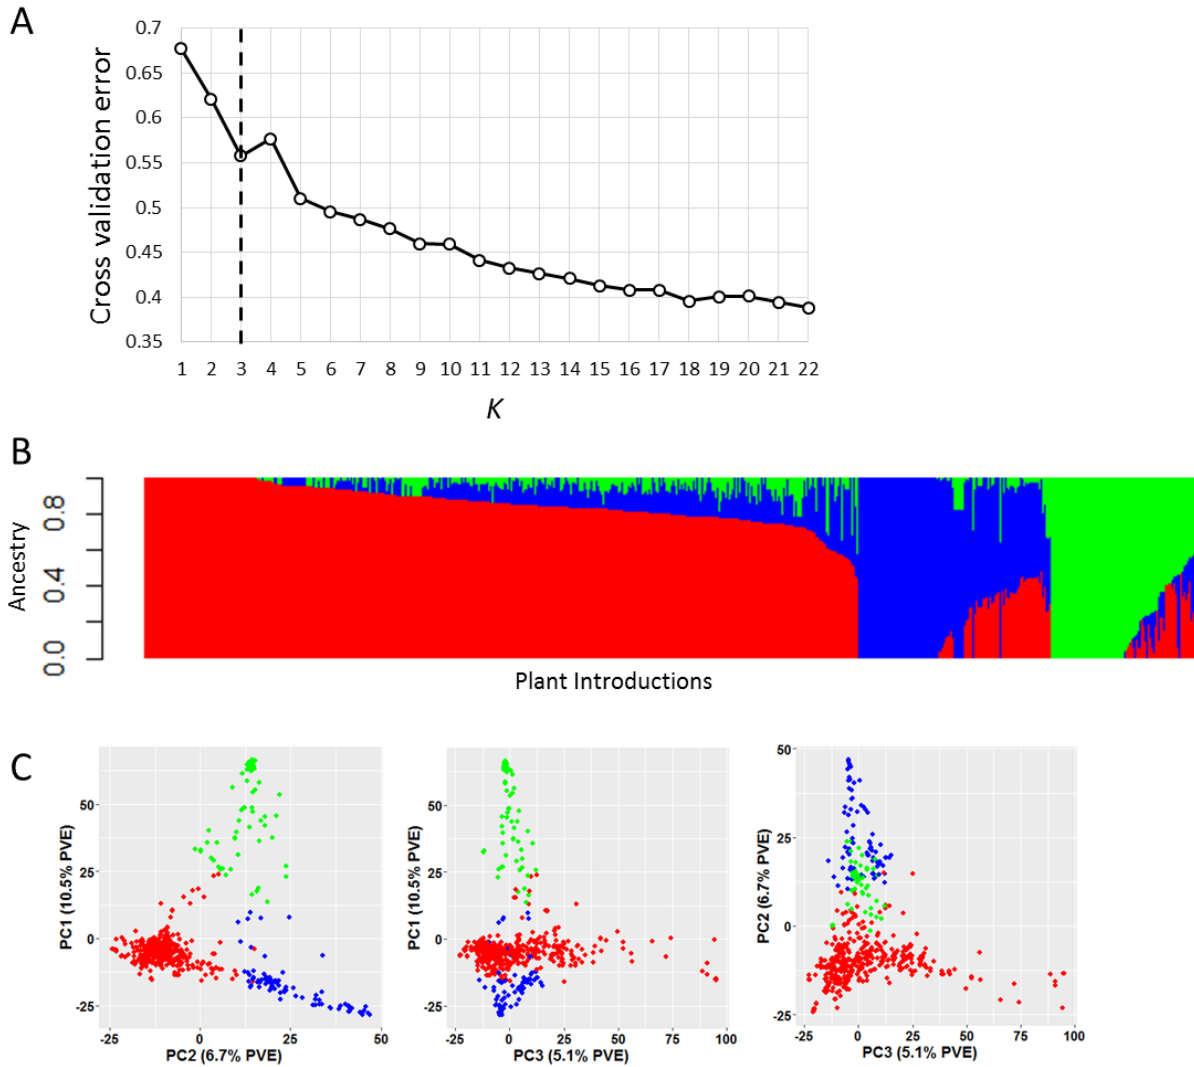

**Supplemental Figure S1.** Examination of population structure of 800 Plant Introductions. Cross validation cross validation error from analysis with ADMIXTURE [1] at  $K = 1$  to  $K = 22$ , where the vertical dashed line corresponds with the selected value of  $K$  (A). Ancestry of plant introductions based on at  $K=3$  (B). Dispersion of predicted populations at  $K=3$  based on the first three principle components (PCs) with percent variance explained (PVE) for each PC indicated in parentheses (C).

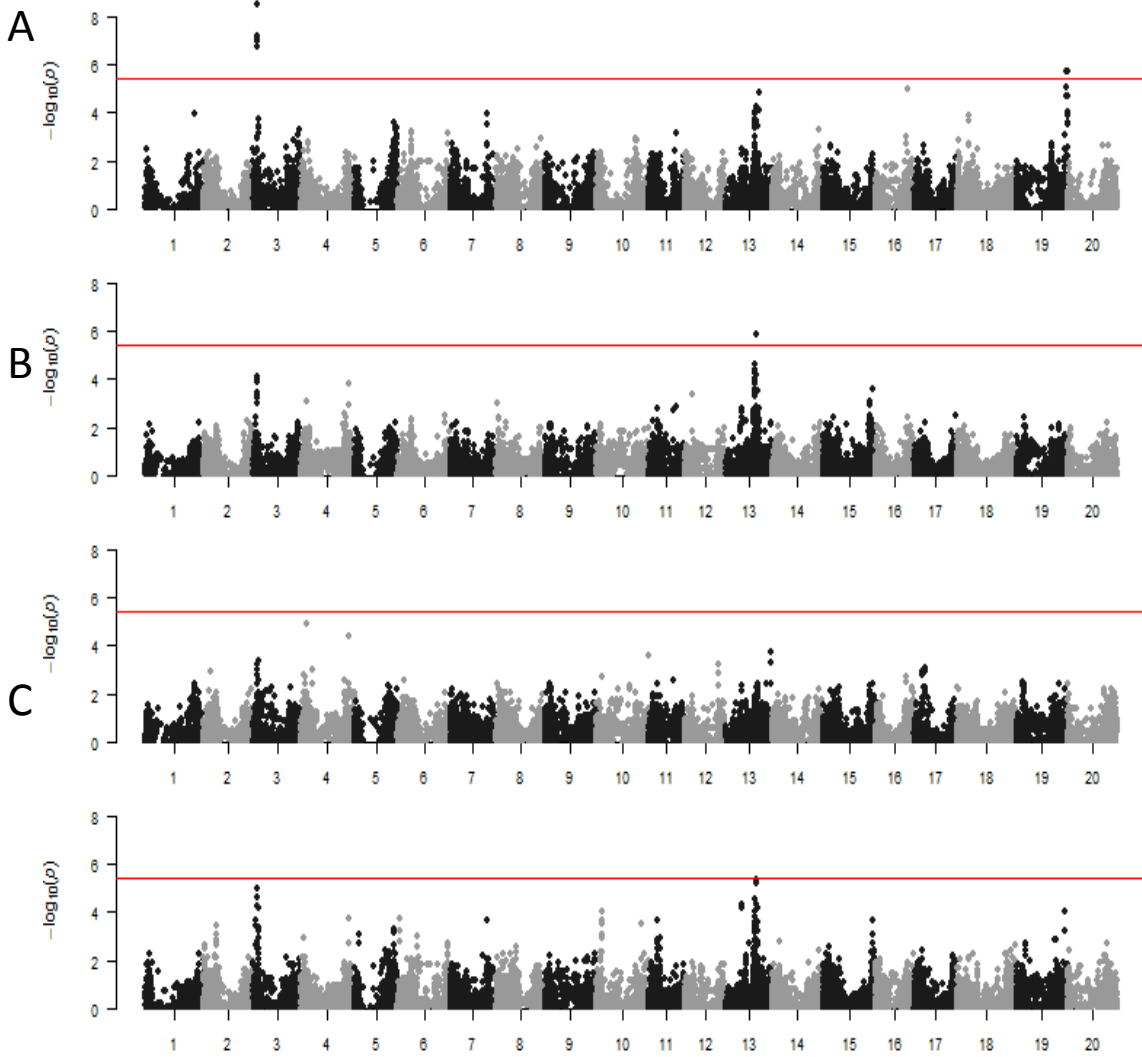

**Supplemental Figure S2.** Manhattan plot of the soybean genome depicting the extent of associations of 19,138 SNPs with inoculated root rot score (A), inoculated root weight (B), inoculated shoot weight (C), and inoculated plant height (D). The  $-\log_{10}(p)$ -value on the y-axis is a measure of the degree to which a SNP is associated with the trait. Chromosomes are displayed on the x-axis. The red horizontal line indicates the genome-wide threshold for significance.

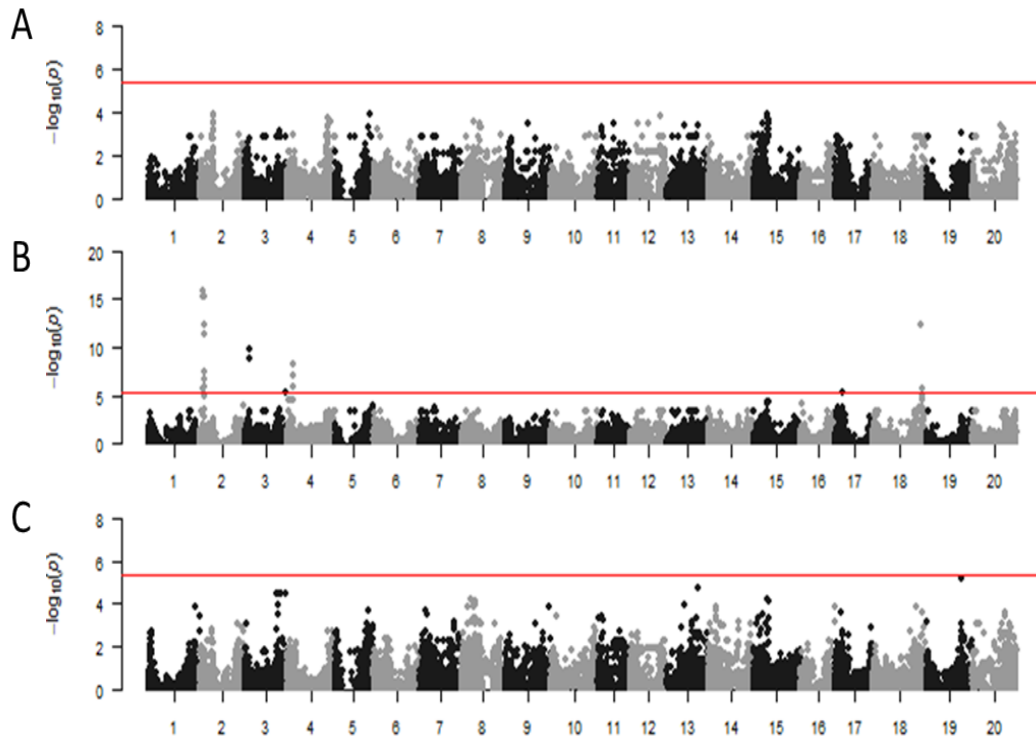

**Supplemental Figure S3.** Manhattan plot of the soybean genome depicting the extent of associations of 19,138 SNPs with non-inoculated root weight (A), non-inoculated shoot weight (B), and non-inoculated plant height (C). The  $-\log_{10}(p\text{-value})$  on the y-axis is a measure of the degree to which a SNP is associated with the trait. Chromosomes are displayed on the x-axis. The red horizontal line indicates the genome-wide threshold for significance.

## References

1. Alexander DH, Novembre J, Lange K. Fast model-based estimation of ancestry in unrelated individuals. *Genome Res.* 2009, 19:1655–1664.
